# Supplementary material
Source: publisher figshare collection journal article supplement (https://sage.figshare.com/ndownloader/files/23166611)
Supplement: Supplementary file 1 [file 23166611]

Appendix A: Detailed attribute definitions provided to respondents

| Therapy Attribute | Definition |
| --- | --- |
| Minimum life extension for half of patients compared to current therapy | As the title suggests, some therapies can help to extend your life relative to current therapies. This is a type of average and as presented, it means that at least half of patients taking the new therapy extended their lives by more months than patients on other prescription therapies. The therapies you will evaluate will be presented to you in terms of the length of extended life and will range from 3 to 24 months. |
| Average increase in toxicity-free days compared to current therapy | This is the increase in the number of days, on average, women who take this medication can go without experiencing the toxic effects of therapy compared to other prescription therapies. Toxicity-free days are days without nausea, vomiting, diarrhea, changes in appetite, mouth sores or fatigue. The therapies you will evaluate will be presented to you in terms of an increase in toxicity-free days of anywhere from 10% to 80%. |
| Average change in major side effects compared to current therapy | This refers to changes in the number and type of side effects, relative to other prescription therapies that may be available. This is an average, so you may have difference experiences. Examples of side effects you may experience while taking a medication include:   - Nerve damage - Heart disease - Cancer of the blood cells - Increased chance of infections - Premature menopause or loss of ability to become pregnant   The therapies you will evaluate will be presented to you in terms of a percentage increase or decrease in major side effects relative to other prescription therapies and will range from 10% fewer major side effects to 5% more major side effects. |
| Treatment requirements | Therapies for the treatment of breast cancer must be administered in specific ways. The method administration varies by therapy.  Administration options for breast cancer include:   - Infusions – intravenous (IV) medications that must be administered in a doctor’s office through an IV, usually over the course of one to five hours - Physician-administered injections – medications a health care professional must administer in a doctor’s office   The therapies you will evaluate will be presented to you in terms of how the therapy is administered, how long it takes to administer and how often it is required. |
| Your monthly out-of-pocket costs | This is the among ***you must pay*** to the physician/pharmacy/hospital for the therapy that is not covered by your health insurance. You must pay this amount every month that you are using the therapy. |
| Monthly insurance company costs | This is the amount the insurance company will pay every month for your use of the therapy. This is ***not*** paid by you. |
| Available test to see if the therapy will work for you | There is always a level of uncertainty whether a therapy will be effective in treating your breast cancer. There may or may not be a test available to determine whether a therapy will work for you. The therapies you will evaluate will be presented to you in terms of whether or not a test is available, and, if a test is available, if the results would indicate it would work for you. |
